# Supplementary material for: Long-term follow-up of patients with phenylketonuria treated with tetrahydrobiopterin: a seven years experience
Source: Springer Nature journal article supplement (doi:10.1186/s13023-015-0227-8), 2015-02-07
Supplement: MOESM1 [file 9776032]

### Additional file 1. Phenotypic and genotypic characterization of HPA subjects

| Subject (#) | Gender | Phenotype | Plasma Phe at diagnosis (micromol/L) | Tolerance (mg Phe/day) | Allele 1      | PRA (%) | Allele 2      | PRA (%) | Age at loading test (years) |
|-------------|--------|-----------|--------------------------------------|------------------------|---------------|---------|---------------|---------|-----------------------------|
| 1           | F      | cPKU      | 1260                                 | 280                    | R261Q         | 44      | P281L         | 2       | 13                          |
| 2           | M      | cPKU      | 1860                                 | 325                    | R261Q         | 44      | P281L         | 2       | 11                          |
| 3           | F      | moPKU     | 1176                                 | 400                    | R261Q         | 44      | R158Q         | 10      | 17                          |
| 4           | F      | moPKU     | 1190                                 | 360                    | R261Q         | 44      | L48S          | 39      | 14                          |
| 5           | M      | moPKU     | 1080                                 | 395                    | R261Q         | 44      | P281L         | 2       | 14                          |
| 6           | M      | moPKU     | 2100                                 | 385                    | L48S          | 39      | Q301P         | 4,4     | 7                           |
| 7           | M      | mPKU      | 650                                  | 505                    | L48S          | 39      | R158Q         | 10      | 14                          |
| 8           | F      | mPKU      | 700                                  | 450                    | L48S          | 39      | D222G         | n.d.    | 12                          |
| 9           | M      | mPKU      | 696                                  | 550                    | 165delT       | n.d.    | P366H         | n.d.    | 18                          |
| 10          | M      | mPKU      | 1158                                 | 410                    | R261Q         | 44      | R261Q         | 44      | 13                          |
| 11          | F      | mPKU      | 1860                                 | 440                    | R261Q         | 44      | IVS10nt-11G>A | 0       | 20                          |
| 12          | M      | mPKU      | 1200                                 | 410                    | R261Q         | 44      | P281L         | 2       | 17                          |
| 13          | F      | mPKU      | 1800                                 | 410                    | L48S          | 39      | R158Q         | 10      | 21                          |
| 14          | M      | mPKU      | 1320                                 | 440                    | L48S          | 39      | R158Q         | 10      | 10                          |
| 15          | F      | mPKU      | 450                                  | 400                    | L48S          | 39      | L48S          | 39      | 5                           |
| 16          | F      | mPKU      | 720                                  | 410                    | R158Q         | 10      | Y414C         | 57      | 12                          |
| 17          | M      | mHPA      | 590                                  | 1500                   | R158Q         | 10      | D338Y         | n.d.    | 14                          |
| 18          | M      | mHPA      | 550                                  | 650                    | L48S          | 39      | R158Q         | 10      | 19                          |
| 19          | M      | mHPA      | 380                                  | 1920                   | 165delT       | n.d.    | P366H         | n.d.    | 22                          |
| 20          | F      | cPKU      | 2184                                 | 345                    | R261X         | 0       | IVS10nt-11G>A | 0       | 17                          |
| 21          | F      | cPKU      | 2130                                 | 340                    | R261Q         | 44      | IVS07nt3G>C   | 0       | 17                          |
| 22          | F      | cPKU      | 1500                                 | 345                    | R261Q         | 44      | IVS10nt-11G>A | 0       | 16                          |
| 23          | M      | cPKU      | 1680                                 | 340                    | R261Q         | 44      | IVS10nt-11G>A | 0       | 12                          |
| 24          | F      | cPKU      | 1500                                 | 280                    | R252W         | 0       | R408W         | <1      | 13                          |
| 25          | M      | cPKU      | 2850                                 | 320                    | R158Q         | 10      | R176X         | 0       | 16                          |
| 26          | F      | cPKU      | 1662                                 | 230                    | IVS10nt-11G>A | 0       | IVS10nt-11G>A | 0       | 13                          |
| 27          | M      | cPKU      | 2160                                 | 320                    | IVS10nt-11G>A | 0       | R261X         | 0       | 16                          |
| 28          | F      | cPKU      | 1920                                 | 330                    | IVS10nt-11G>A | 0       | L213P         | n.d.    | 18                          |
| 29          | F      | cPKU      | 1800                                 | 265                    | R261Q         | 44      | IVS10nt-11G>A | 0       | 20                          |
| 30          | F      | cPKU      | 1200                                 | 285                    | P281L         | 2       | P281L         | 2       | 16                          |
| 31          | M      | cPKU      | 1200                                 | 291                    | ISV10nt546    | <1      | R261Q         | 44      | 15                          |
| 32          | M      | cPKU      | 1560                                 | 324                    | pS16>xFsx1    | <1      | IVS7+3G>C     | n.d.    | 14                          |
| 33          | F      | cPKU      | 4272                                 | 220                    | R158Q         | 10      | R158Q         | 10      | 11                          |
| 34          | M      | cPKU      | 1200                                 | 258                    | R158Q         | 10      | Y414C         | 57      | 5                           |
| 35          | F      | cPKU      | 900                                  | 291                    | ISV10nt546    | <1      | ISV10nt546    | <1      | 16                          |
| 36          | F      | cPKU      | 1200                                 | 220                    | ISV10nt546    | <1      | ISV10nt546    | <1      | 5                           |

|    |   |       |      |     |                       |      |               |    |    |
|----|---|-------|------|-----|-----------------------|------|---------------|----|----|
| 37 | F | cPKU  | 1180 | 223 | ISV10nt546            | <1   | ISV10nt546    | <1 | 7  |
| 38 | F | cPKU  | 1220 | 270 | ISV10nt546            | <1   | 165delT       | <1 | 8  |
| 39 | M | moPKU | 1800 | 390 | P281L                 | 2    | R158Q         | 10 | 14 |
| 40 | M | moPKU | 1200 | 390 | F39del(116-118delTCT) | 20   | IVS10nt-11G>A | 0  | 12 |
| 41 | F | mPKU  | 1800 | 505 | W187X                 | 0    | P281L         | 2  | 17 |
| 42 | F | mHPA  | 1500 | 630 | IVS06nt-2delA         | n.d. | P281L         | 2  | 24 |
| 43 | M | mHPA  | 420  | 620 | L48S                  | 39   | L48S          | 39 | 7  |

Note: Patients were phenotypically classified according to plasma Phe level at diagnosis and Phe tolerance calculated at 5 years of age. When Phe at diagnosis was inconsistent with Phe tolerance, patients were classified according to the latter parameter. The predictive enzymatic activity (PRA) is the average of the data obtained in eukaryotic cells, as reported in the BIOPKU database (<http://www.biopku.org>) and in Daniele et al, 2006. n.d.: not determined. Patients # 1 to 19 resulted as BH4 responders; patients # 20 to 43 resulted as BH4 non-responders.
