# Supplementary material for: Long-term follow-up of patients with phenylketonuria treated with tetrahydrobiopterin: a seven years experience
Source: Springer Nature journal article supplement (doi:10.1186/s13023-015-0227-8), 2015-02-07

**Additional file 2. Study diagram**

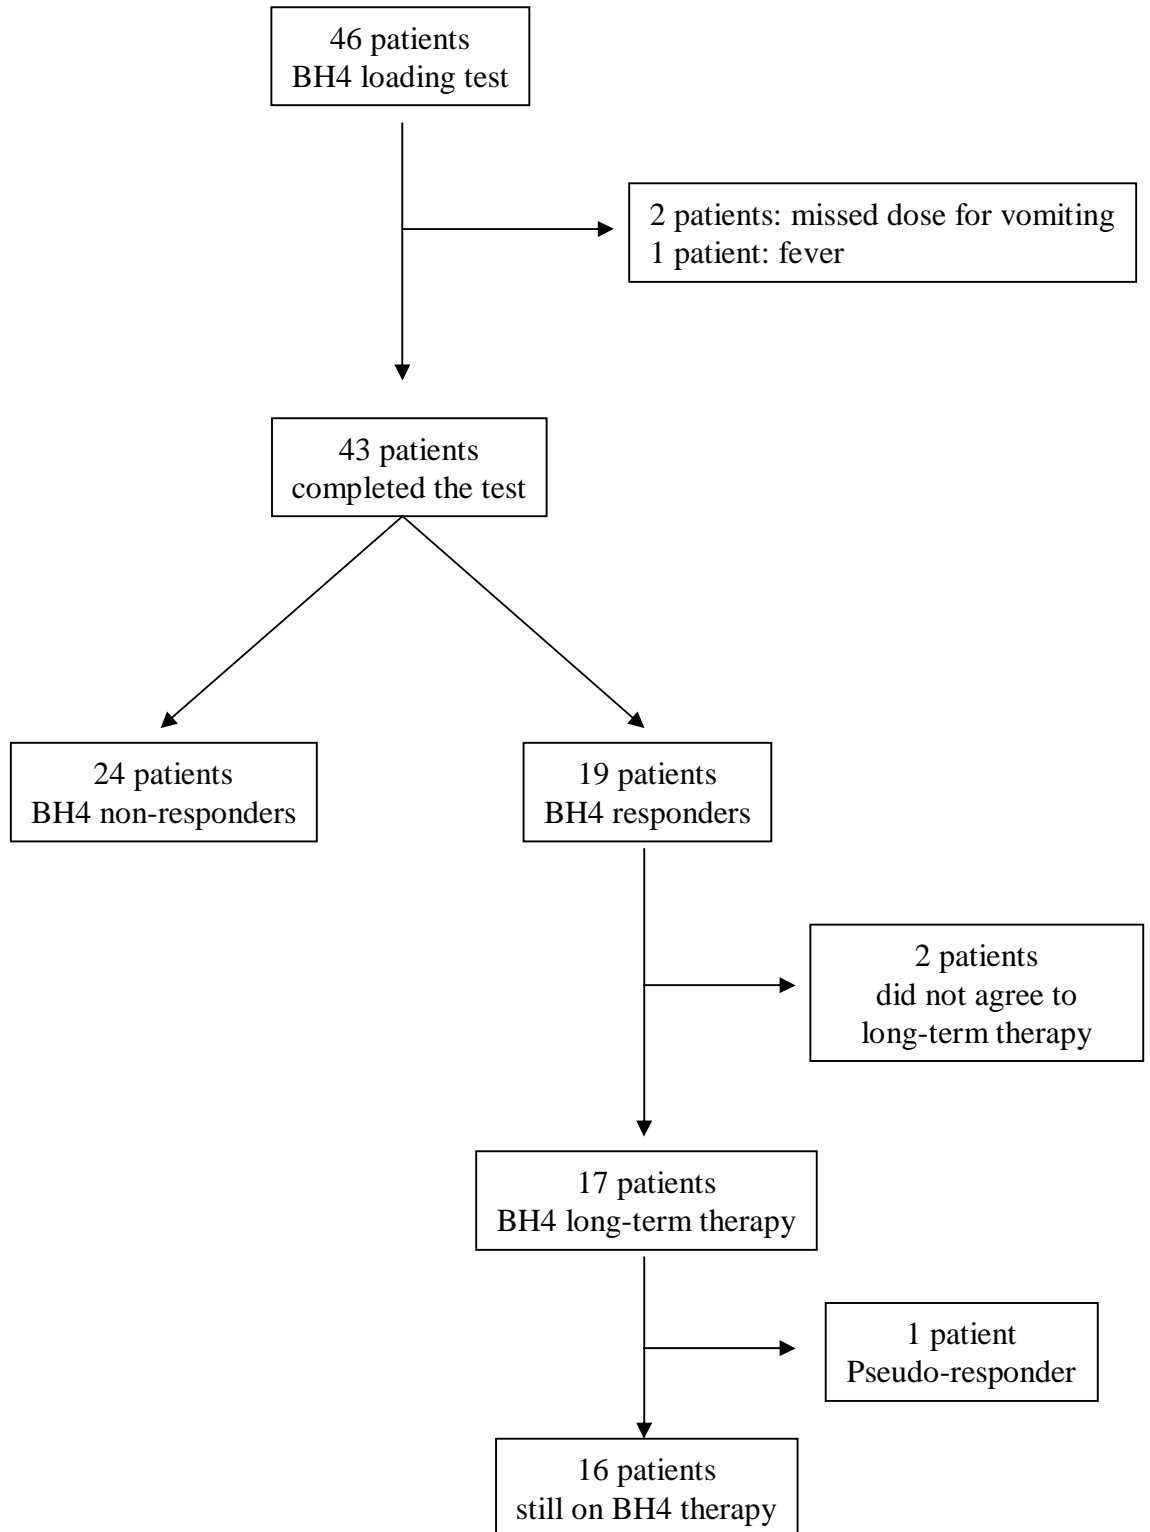

Supplement: MOESM2 [file 9776032]
