# Supplementary material for: Long-term follow-up of patients with phenylketonuria treated with tetrahydrobiopterin: a seven years experience
Source: Springer Nature journal article supplement (doi:10.1186/s13023-015-0227-8), 2015-02-07
Supplement: MOESM3 [file 9776032]

**Additional file 3. Body mass index (BMI) of patients on long-term treatment with BH4**

|                              | BMI (mean±SD) |           | p-value      |
|------------------------------|---------------|-----------|--------------|
|                              | Pre -BH4*     | On BH4    |              |
| <b>Overall patients</b>      | 21.7±2.1      | 23.6±1.39 | <b>0.006</b> |
| cPKU                         | 23.29±0.19    | 24±0.49   | 0.15         |
| moPKU                        | 20.5±1.5      | 23.4±1.2  | <b>0.02</b>  |
| mPKU                         | 21±1.3        | 23±1.5    | <b>0.008</b> |
| HPA                          | 24.8±2.5      | 24.6±1.5  | 0.9          |
| <b>Patients on BH4+DIET</b>  | 21±1.7        | 23.5±1.5  | <b>0.01</b>  |
| <b>Patients on BH4 alone</b> | 22.5±2.5      | 23.8±1.3  | 0.2          |

\* 5 years before start of treatment
