# Supplementary material for: Long-term follow-up of patients with phenylketonuria treated with tetrahydrobiopterin: a seven years experience
Source: Springer Nature journal article supplement (doi:10.1186/s13023-015-0227-8), 2015-02-07

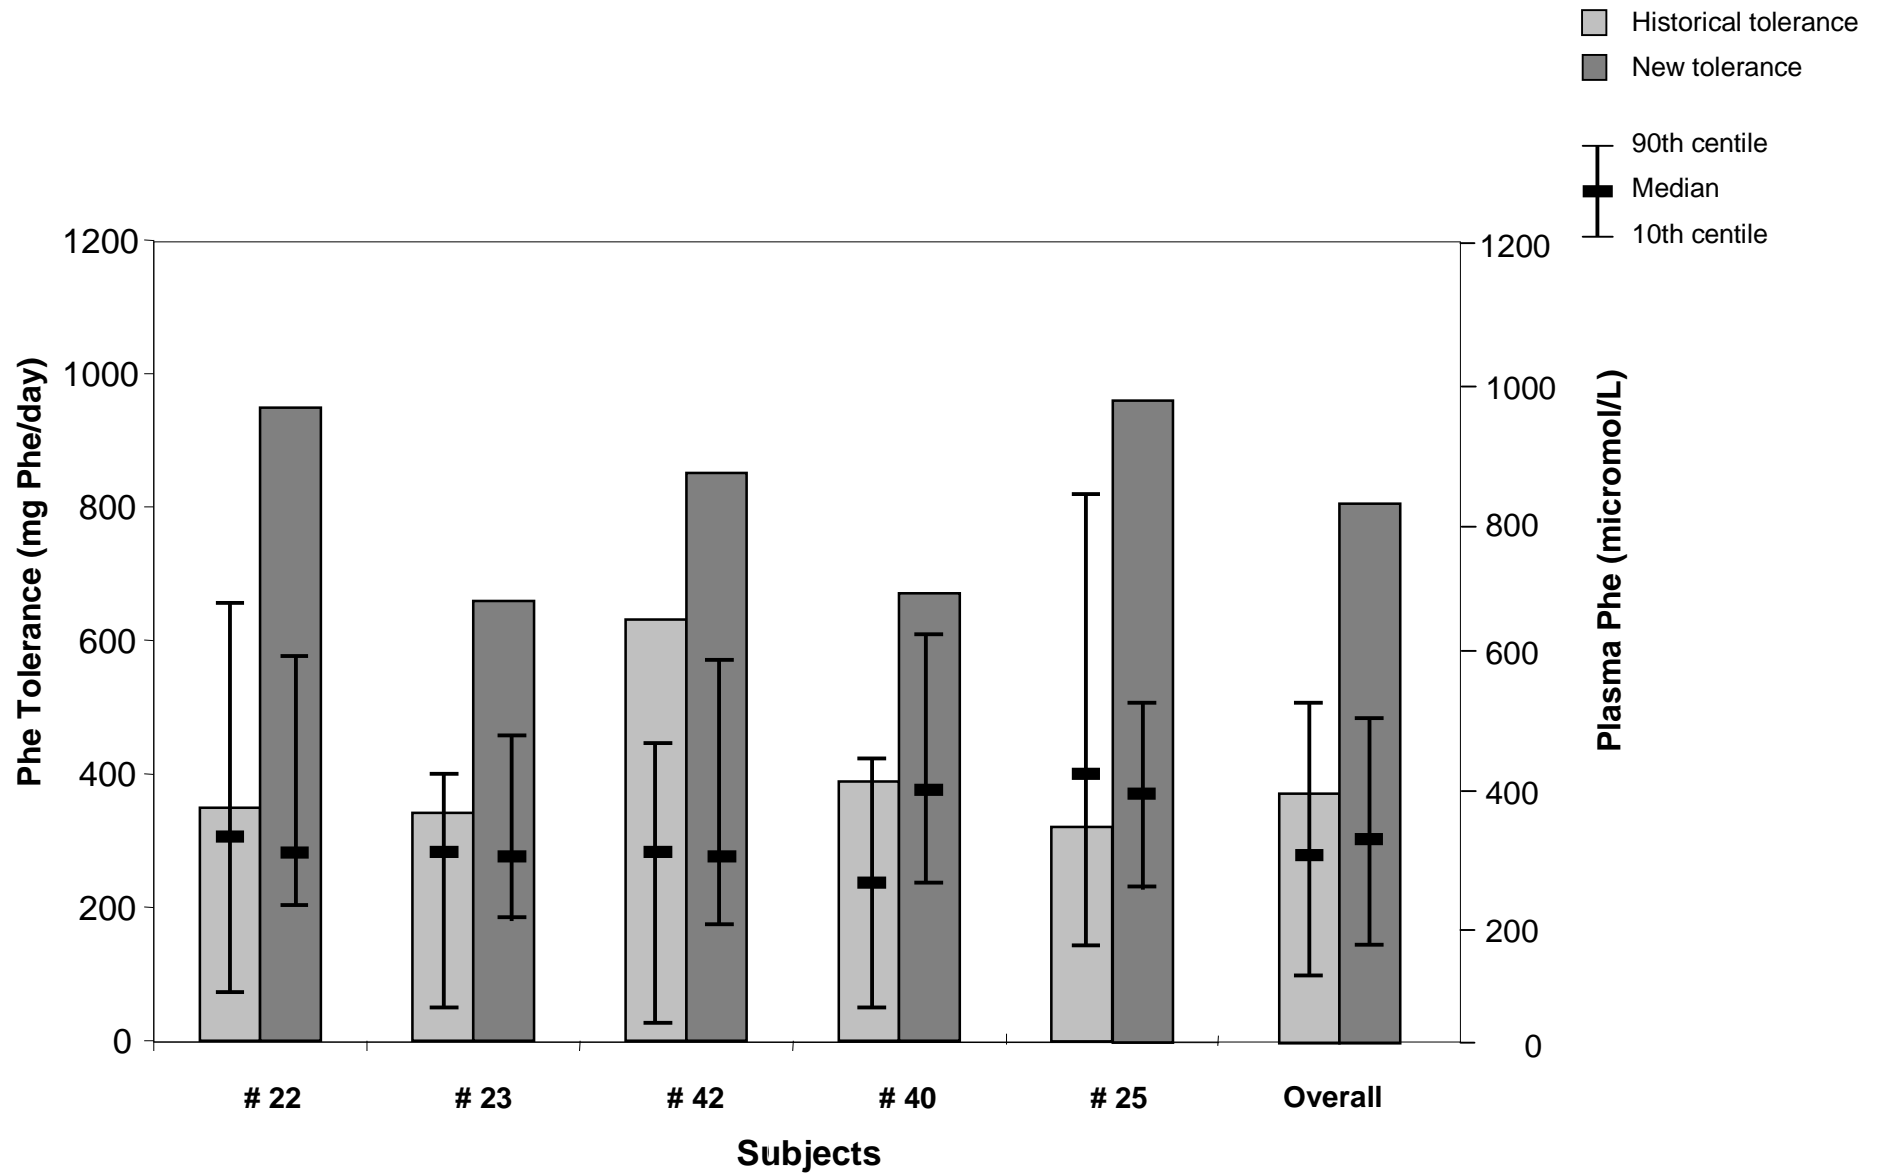

Supplement: MOESM4 [file 9776032]
